# Supplementary material
Source: PubMed Central journal article supplement (PMC4738087)

**SUPPLEMENTAL MATERIAL**

**Supplemental Table 1A.** Prevalent, concurrent and future AF in 1166 HF participants (HFpEF vs HFrEF vs unclassified HF)

|                         |   | No AF | Prevalent AF | Concurrent AF | Future AF |
|-------------------------|---|-------|--------------|---------------|-----------|
| HFpEF (n=479)           | n | 181   | 154          | 88            | 56        |
|                         | % | 38    | 32           | 18            | 12        |
| HFrEF (n=516)           | n | 234   | 121          | 94            | 67        |
|                         | % | 45    | 23           | 18            | 13        |
| Unclassified HF (n=171) | n | 87    | 42           | 32            | 10        |
|                         | % | 51    | 25           | 19            | 6         |
| Total HF (n=1166)       | n | 502   | 317          | 214           | 133       |
|                         | % | 43    | 27           | 18            | 11        |

AF = atrial fibrillation; HF = heart failure; HFpEF = heart failure with preserved ejection fraction; HFrEF = heart failure with reduced ejection fraction.

**Supplemental Table 1B.** Previous, concurrent and future HF (HFpEF vs HFrEF vs unclassified HF) in those who had 1737 AF

|                   |   | No HF | Prevalent HF | Concurrent HF | Future HF |
|-------------------|---|-------|--------------|---------------|-----------|
| Total AF (n=1737) | n | 1101  | 145          | 214           | 277       |
|                   | % | 63    | 8            | 12            | 16        |
| HFpEF             | n |       | 57           | 88            | 139       |
|                   | % |       | 3            | 5             | 8         |
| HFrEF             | n |       | 67           | 94            | 111       |
|                   | % |       | 4            | 5             | 6         |
| Unclassified HF   | n |       | 21           | 32            | 27        |
|                   | % |       | 1            | 2             | 2         |

AF = atrial fibrillation; HF = heart failure; HFpEF = heart failure with preserved ejection fraction; HFrEF = heart failure with reduced ejection fraction.

**Supplemental Table 2.** Baseline characteristics of participants included in mortality analysis

|                                        | <b>HF</b><br>N=759 | <b>HFpEF</b><br>N=309 | <b>HFrEF</b><br>N=360 | <b>AF</b><br>N=1191 |
|----------------------------------------|--------------------|-----------------------|-----------------------|---------------------|
| Age, years                             | 78±10              | 79 ± 11               | 77 ± 10               | 75 ± 11             |
| Women, n (%)                           | 355 (47)           | 182 (59)              | 123 (34)              | 514 (43)            |
| Height, cm                             | 164 ± 11           | 162 ± 11              | 166 ± 10              | 166 ± 11            |
| Weight, kg                             | 75 ± 18            | 75 ± 19               | 77 ± 17               | 77 ± 18             |
| Body mass index, kg/m <sup>2</sup>     | 28 ± 5             | 29 ± 6                | 28 ± 5                | 28 ± 5              |
| Systolic blood pressure, mmHg          | 143 ± 22           | 142 ± 21              | 143 ± 23              | 140 ± 22            |
| Diastolic blood pressure, mmHg         | 73 ± 12            | 73 ± 11               | 73 ± 12               | 74 ± 11             |
| Hypertension treatment, n (%)          | 492 (65)           | 222 (72)              | 221 (61)              | 664 (56)            |
| Prevalent myocardial infarction, n (%) | 321 (42)           | 86 (28)               | 196 (54)              | 274 (23)            |
| Smoking, n (%)                         | 110 (14)           | 41 (13)               | 58 (16)               | 177 (15)            |
| Diabetes mellitus, n (%)               | 196 (26)           | 73 (24)               | 106 (29)              | 201 (17)            |
| Left ventricular hypertrophy, n (%)    | 70 (10)            | 21 (7)                | 40 (12)               | 55 (5)              |
| Prevalent HF, n (%)                    | -                  | -                     | -                     | 214 (18)            |
| Prevalent AF, n (%)                    | 295 (39)           | 128 (41)              | 130 (36)              | -                   |

Values are mean ± SD unless otherwise noted.

AF = atrial fibrillation; HF = heart failure; HFpEF=heart failure with preserved ejection fraction; HFrEF=heart failure with reduced ejection fraction.

**Supplemental Table 3.** Sex-specific, age-standardized incident rates of HF among those with AF

|                | <b>Men</b>                                       | <b>Women</b>                                     |
|----------------|--------------------------------------------------|--------------------------------------------------|
|                | Incidence rate per 1000 person-years<br>(95% CI) | Incidence rate per 1000 person-years<br>(95% CI) |
| Incident HF    | 50.7 (41.9, 59.6)                                | 56.0 (45.5, 66.6)                                |
| Incident HFpEF | 21.2 (15.3, 27.0)                                | 35.1 (26.9, 43.4)                                |
| Incident HFrEF | 27.2 (20.8, 33.5)                                | 12.4 (7.4, 17.4)                                 |

CI=confidence interval; HF=heart failure; HFpEF=heart failure with preserved ejection fraction; HFrEF=heart failure with reduced ejection fraction.

**Supplemental Table 4.** Incidence rates of cause-specific death among participants with AF

|                  | <b>Coronary heart disease death</b> | <b>Cerebrovascular death</b>    | <b>Other cardiovascular death</b> |
|------------------|-------------------------------------|---------------------------------|-----------------------------------|
|                  | <b>Incidence rates (95% CI)</b>     | <b>Incidence rates (95% CI)</b> | <b>Incidence rates (95% CI)</b>   |
| No heart failure | 11.62 (8.44-14.80)                  | 8.58 (5.88-11.28)               | 14.82 (11.18-18.47)               |
| HFpEF            | 14.38 (1.45-27.31)                  | 18.80 (3.61-33.99)              | 52.19 (26.20-78.18)               |
| HFrEF            | 95.65 (57.87-133.4)                 | 7.63 (-1.10-16.35)              | 85.15 (50.84-119.5)               |

CI=confidence interval; HFpEF=heart failure with preserved ejection fraction; HFrEF=heart failure with reduced ejection fraction.

**Supplemental Table 5.** Cumulative incidence and 95% confidence intervals for Figures 2 and 3

| Outcome                        | Group      | Year 4 cumulative incidence (%) |             | Year 8 cumulative incidence (%) |             |
|--------------------------------|------------|---------------------------------|-------------|---------------------------------|-------------|
|                                |            | Est                             | 95% CI      | Est                             | 95% CI      |
| Incident AF<br>(Fig 2A)        | Prev HF    | 0.11                            | (0.06-0.19) | 0.20                            | (0.12-0.29) |
|                                | No HF      | 0.02                            | (0.02-0.03) | 0.05                            | (0.05-0.06) |
| Incident HFPEF<br>(Fig 2B)     | Prev AF    | 0.03                            | (0.02-0.06) | 0.07                            | (0.05-0.10) |
|                                | No AF      | 0.01                            | (0.00-0.01) | 0.01                            | (0.01-0.01) |
| Incident HFREF<br>(Fig 2B)     | Prev AF    | 0.05                            | (0.03-0.07) | 0.08                            | (0.05-0.11) |
|                                | No AF      | 0.01                            | (0.01-0.01) | 0.02                            | (0.01-0.02) |
| Mortality after HF<br>(Fig 3A) | Prev AF    | 0.57                            | (0.51-0.62) | 0.83                            | (0.78-0.87) |
|                                | No AF      | 0.56                            | (0.51-0.60) | 0.77                            | (0.72-0.80) |
| Mortality after AF<br>(Fig 3B) | Prev HFpEF | 0.53                            | (0.42-0.63) | 0.78                            | (0.66-0.86) |
|                                | Prev HFrEF | 0.63                            | (0.54-0.71) | 0.86                            | (0.78-0.91) |
|                                | No HF      | 0.31                            | (0.28-0.34) | 0.51                            | (0.47-0.54) |

## **Supplemental Figure legends**

### **Supplemental Figure 1: Study design**

**Panel A** displays participants free of prevalent AF.

**Panel B** displays participants free of prevalent HF

### **Supplemental Figure 2: Inclusion and exclusion criteria for study sample.**

**Panel A** shows samples included in the incident AF and HF analyses.

**Panel B** shows samples included in the mortality after AF and HF analyses.

### **Supplemental Figure 3: Time between diagnosis of AF and HF diagnosis (years)**

**Panel A** displays time between diagnosis of AF and HFpEF.

**Panel B** displays time between diagnosis of AF and HFrEF. Zero represents AF and HF diagnosis on the same day.

**Supplemental Figure 1**

**A.**

**Original cohort**

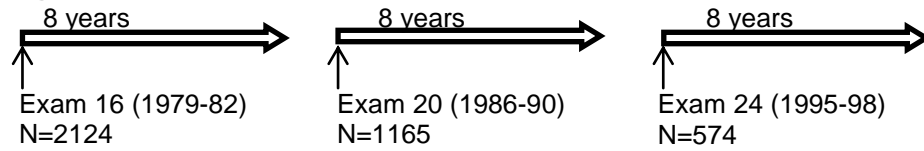

**Offspring cohort**

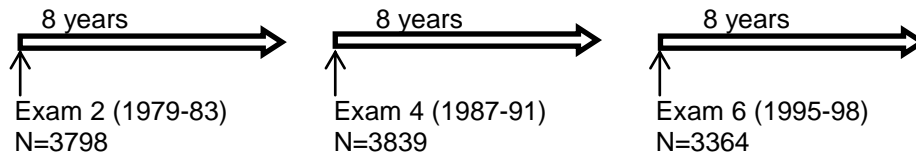

**B.**

**Original cohort**

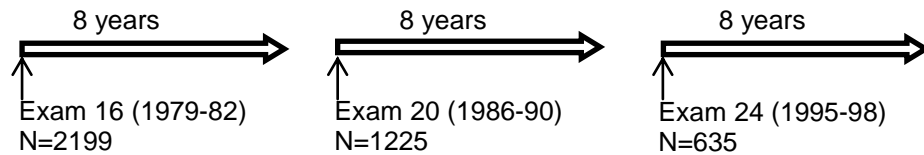

**Offspring cohort**

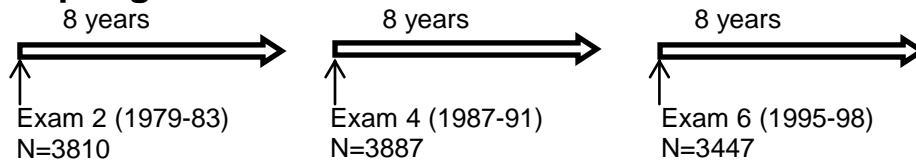



## Supplemental Figure 2

A.

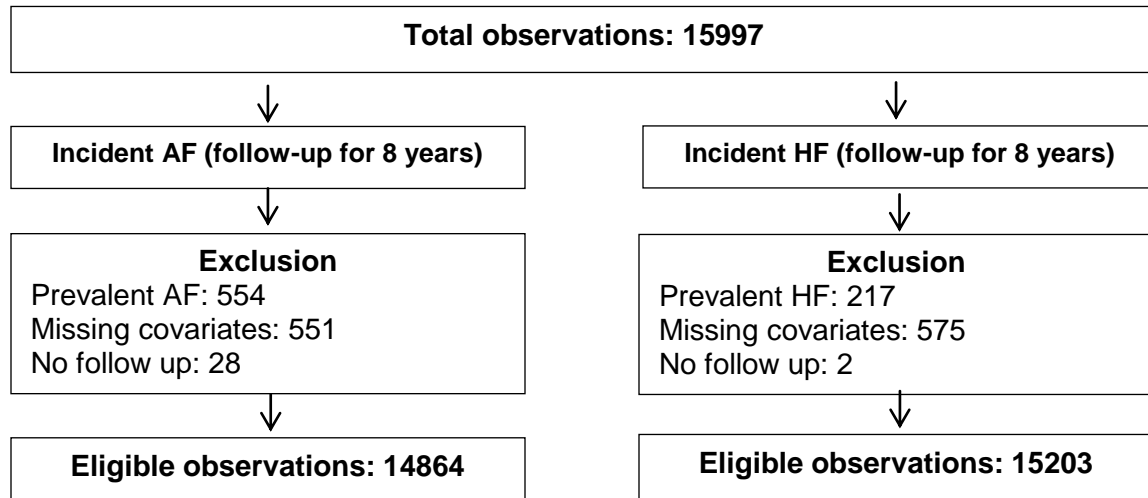

B.

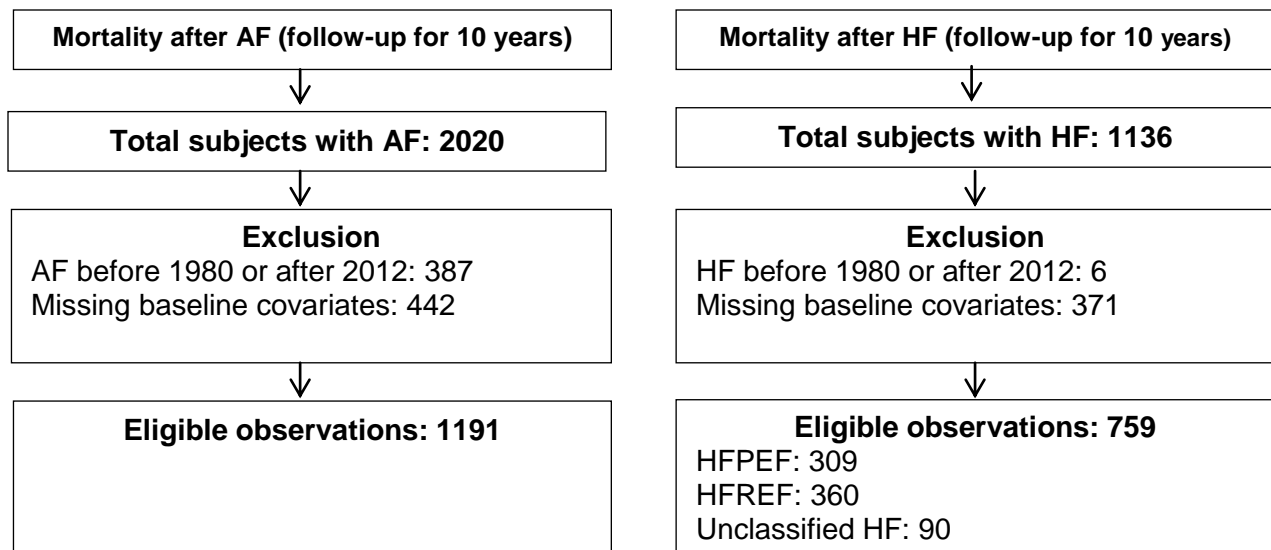

### Supplemental Figure 3

A.

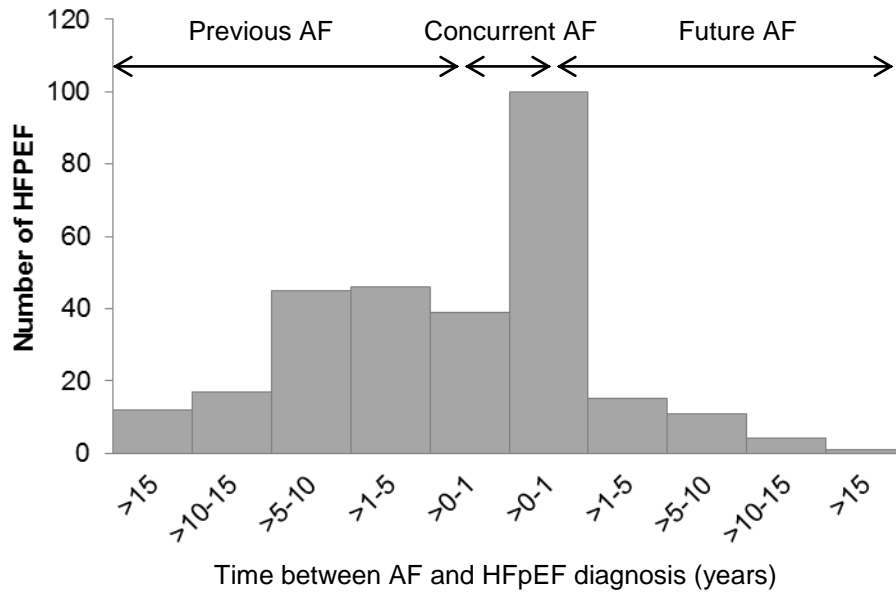

B.

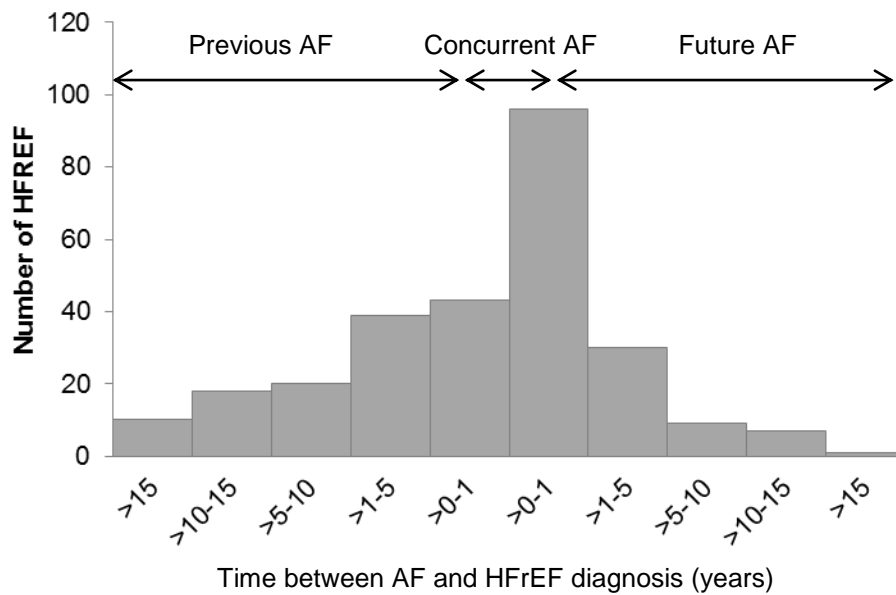

Supplement: NIHMS747587-supplement-Supplemental_Material.pdf [file NIHMS747587-supplement-Supplemental_Material.pdf]
